# Supplementary material
Source: PubMed Central journal article supplement (PMC1568144)

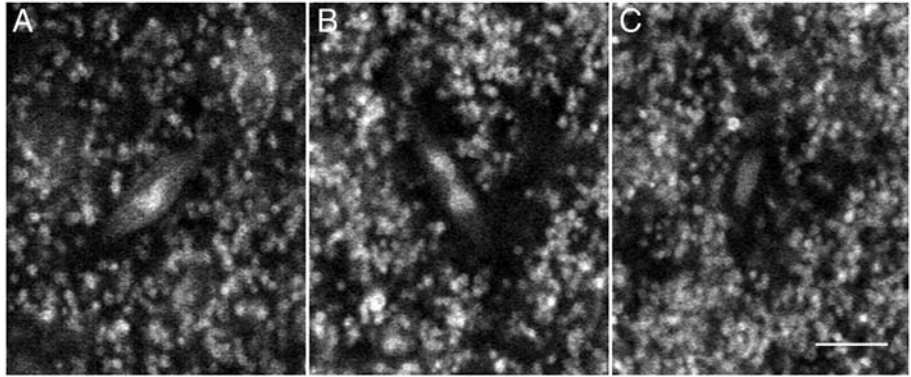

Supplement: NIHMS4996-supplement-FigS1.pdf [file NIHMS4996-supplement-FigS1.pdf]
